# Supplementary material for: Duration of dam contact had a long effect on calf rumen microbiota without affecting growth
Source: Front Vet Sci. 2025 May 12;12:1548892. doi: 10.3389/fvets.2025.1548892 (PMC12105649; doi:10.3389/fvets.2025.1548892)
Supplement: Supplementary file 2 [file Table_1.xlsx]

## Sheet: Table S7
	Supplemetary Table 7. Relative abundance at phylum and genus levels among groups of calves separated from dams at birth (Control), at the age of 4 weeks (Mixed) or at weaning (Dam) and sampled at the age of 3, 10, 13 and 20 weeks. Values are medians for each group.
	Taxon 1		Control								Mixed								Dam								IQR				Kruskall Wallis (Bonferonni p_value)
			w3		w10		w13		w20		w3		w10		w13		w20		w3		w10		w13		w20		w3	w10	w13	w20	Groups	Time	Time(Groups)1
	Phyla
	Actinomycetota		0		0		0		0		0		0		0.000236995		0		0		0		0		0		0.000315477	0	0.000725383	0	0.189935	0.0200915	0.106233
	Armatimonadota		0		0		0	a	0.000710384		0		0		0.000204337	b	0.000553576		0		0		0	a	0		0	0	0	0.000626513	0.000385987	7.80336e-06	5.16026e-07
	Bacteroidota		0.00734348		0.00611559		0.00519246	a	0.00894129		0.0220713		0.0132825		0.00920893	b	0.00924669		0.0155297		0.0128155		0.00663776	ab	0.0125265		0.13285	0.131325	0.0977337	0.208724	0.0423258	0.126761	0.0413203
	Campylobacterota		0.00323437		0.000391028		0.000385455		0		0.00295052		0.000671993		0.00049793		0.000120938		0.00316793		0.000654901		0.000545984		0.000235583		0.00473989	0.000555623	0.000458697	0.000275686	0.921529	1.25658e-09	1.89934e-06
	d__Archaea Kingdom		0		0		0	a	0	c	0		0		0	a	0	c	0		0		0	b	0.00217248	d	0	0	0	0.000407398	0.00380577	0.0596249	1.23671e-05
	d__Bacteria Kingdom		0.0407912	a	0.0486366	c	0.0543321		0.0933244		0.0832642	b	0.101217	d	0.0746108		0.0847995		0.063594	b	0.0922262	cd	0.0633948		0.0955911		0.0414739	0.0580612	0.0286827	0.0157326	0.000245725	0.000850717	0.000154488
	Bacillota (Firmicutes_A)		0.0120118	ab	0.00907356		0.0170885		0.028384		0.00809795	a	0.0218498		0.0276511		0.0302222		0.0118867	b	0.0155114		0.0182773		0.0279213		0.0354583	0.0334109	0.0373051	0.0397802	0.632888	0.0380197	0.11428
	Bacillota (Firmicutes_C)		0.0227852		0.0351816	a	0.0457221		0.0234639		0.0195818		0.0280097	ab	0.0258399		0.0201158		0.0184511		0.0196444	b	0.038109		0.0200005		0.0117733	0.0156338	0.0195112	0.00397321	0.00342757	7.9307e-05	0.000189514
	Bacillota (Firmicutes_D)		0.000857633		0		0.00129844		0.00718295		0.00207104		0.00236394		0.00292612		0.00750431		0.00168231		0.000962667		0		0.00534062		0.00524988	0.0110856	0.010857	0.0169701	0.465789	1.32994e-07	4.80878e-05
	Pseudomonadota		0		0		0		0		0.00080079		0		0		0		0.000159847		0		0		0		0.0048173	0.00143106	0.000450172	0.00113353	0.0206618	0.0110053	0.00862519
	Spirochaetota		0.00932793		0.00866642	a	0.02423		0.0174422		0.0179512		0.0227731	b	0.0320772		0.0135598		0.0190734		0.00828462	ab	0.0239542		0.0161122		0.0120931	0.010242	0.0188502	0.00744389	0.0721212	9.59526e-05	0.000243717
	Thermoplasmatota		0.000808688		0.00120968		0.000577847	ab	0.00320925		0.00368084		0.00253864		0.00138896	a	0.00280168		0.00261201		0.000952066		0.000369171	b	0.0030177		0.00373809	0.00197505	0.00102206	0.000746103	0.0034894	1.52626e-05	1.354e-05
	Unassigned Kingdom		0		0		0		0	ab	0.00184408		0		0		0	a	0		0		0		0.00232217	b	0.00184408	0.000932583	0	0	0.000263951	0.564938	0.00508493
	Verrucomicrobiota		0	a	0		0		0.000622055		0	ab	0		0		0.00076684		0.00035417	b	0		0		0.000492829		0.00035417	0	0	0.000566762	0.0371272	4.1884e-12	3.27016e-10
	1 Time(Groups) is an artificial variable used to assess the group effect independent of the sampling period. When signficant a Dunn post-hoc test (P < 0.05), p-adjusted Benjamin-Hochberg Procedure (FDR) followed and different superscript in the same row by time category show significant differences.
	Genus
	Achromobacter		0.00804445		0		0		0		0.00456356		0		0		0		0		0		0		0		0.00662079	0	0	0	0.5617	1.93219e-13	7.75984e-12
	Acinetobacter		0.000484938		0		0		0		0.000962682		0		0		0		0.000217331		0.000206811		0		0		0.00112564	0.000192656	0	0	0.833325	4.28277e-06	4.41344e-05
	Actinomycetia Class		0		0		0.00150042		0.000992531		0.000461969		0		0.000868432		0.00102176		0		0		0		0.000414429		0.000285258	0.00156832	0.00155918	0.00134274	0.0233116	0.117514	0.063169
	Alphaproteobacteria Class		0		0		0		0.000288074		0		0		0		0		0		0		0		0		0	0	0	0.000139532	0.0536651	0.00650427	0.000544836
	Anaerotignum_189125		0.0218346		0.0150239		0.0278154		0.0304302		0.0353982		0.037103		0.0325078		0.0301773		0.0323817		0.0243487		0.0236127		0.0286078		0.015281	0.0136969	0.0107062	0.00330619	0.000156397	0.130543	0.000709391
	Bacillales_B_306089 Order		0		0.00134409		0.00301453		0.0126028		0.000907853		0.00873591		0.00571155		0.013056		0		0.00475209		0		0.0107365		0.00232908	0.00716188	0.00552486	0.00383146	0.00373543	1.53524e-10	1.53431e-09
	Bacilli Class		0.0098968		0.0181729		0.0207664		0.0457499		0.0143251		0.0387435		0.0262506		0.0492284		0.0146543		0.0254722		0.0316903		0.0433477		0.0197065	0.0182268	0.0150986	0.0124058	0.14017	1.8822e-07	2.50142e-05
	Bacillus_A		0		0		0.000225759		0		0.00173505		0		0		0		0.00176737		0		0		0		0.00255754	0	0.000239284	0	0.0891106	1.89296e-06	6.59482e-08
	Bacillus_P_294101		0.0129717		0.00730652		0.00585843		0.00718295		0.00363025		0.00376907		0.00308659		0.00750431		0.00104642		0.00252323		0.00240369		0.00596309		0.00550963	0.00543056	0.00248189	0.00341511	0.000409203	0.0086012	0.00037027
	Bacteroidaceae Family		0.0388668		0.0125484		0.0080897		0.0137319		0.0852197		0.0132825		0.0103168		0.015311		0.0561617		0.0252744		0.010422		0.015843		0.0588812	0.014728	0.0107824	0.00362738	0.351277	3.01151e-10	3.51987e-07
	Bacteroidales Order		0.00340023		0.00146371		0.00148073		0.00828878		0.0085463		0.0178215		0.0158058		0.0104322		0.0113491		0.00427134		0.00302062		0.010452		0.0111967	0.0148882	0.0116607	0.00533578	1.96695e-05	0.36314	0.000885826
	Bacteroidia Class		0		0		0		0		0		0		0		0		0		0		0		0		0	0	0	0	0.00310939	0.123656	0.0027634
	Bifidobacterium_388775		0		0		0.000790157		0		0		0		0.000785184		0		0		0		0.00295037		0		0.000202607	0	0.00348414	0	0.813488	3.01648e-10	3.72597e-07
	CAG-488		0.00496765		0.002075		0.000404592		0.0409637		0.00290954		0.0114269		0.0370105		0.0501786		0.0018782		0.00533918		0.0125381		0.0264525		0.00547764	0.00896225	0.0271899	0.0171948	0.00359004	2.74198e-07	1.42501e-06
	Cellvibrio		0.0190267		0		0		0.000569296		0.00385828		0.00128592		0		0		0.0112692		0.000861712		0.000428243		0		0.0145939	0.0013733	0.00111713	0.000242083	0.442618	1.70487e-11	2.09432e-08
	Clostridia_258483 Class		0.0188257		0.0263111		0.0213577		0.0299773		0.0137477		0.0315845		0.0285974		0.0302222		0.0197971		0.0356045		0.0444034		0.0376365		0.010817	0.0165036	0.017536	0.00797711	0.0224925	0.0029663	0.00871326
	Clostridioides_A		0.000656093		0.00231062		0.000835878		0.000286214		0.000493929		0.00162849		0		0.00052043		0.000359655		0.00355178		0.000701075		0.000847301		0.000719452	0.00317404	0.00133806	0.00109547	0.0608981	0.00212386	0.00398636
	Corynebacterium		0		0		0		0		0		0		0		0		0		0		0		0		0	0	0	0	0.0608578	0.0284719	0.00126702
	Cronobacter		0		0		0		0		0		0		0		0		0		0		0		0		0	0	0	0	0.0161777	0.0117385	2.1902e-05
	d__Archaea Kingdom		0		0		0		0		0		0		0		0		0		0		0		0.00217248		0	0	0	0.000407398	0.00380577	0.0596249	1.23671e-05
	d__Bacteria Kingdom		0.0407912		0.0486366		0.0543321		0.0933244		0.0832642		0.101217		0.0746108		0.0847995		0.063594		0.0922262		0.0633948		0.0955911		0.0414739	0.0580612	0.0286827	0.0157326	0.000245725	0.000850717	0.000154488
	DTFW01		0.000808688		0.00120968		0.000577847		0.00320925		0.00368084		0.00253864		0.00138896		0.00280168		0.00261201		0.000952066		0.000369171		0.0030177		0.00373809	0.00197505	0.00102206	0.000746103	0.0034894	1.52626e-05	1.354e-05
	DTJY01		0		0		0		0.000710384		0		0		0.000204337		0.000553576		0		0		0		0		0	0	0	0.000626513	0.000385987	7.80336e-06	5.16026e-07
	Ensifer		0		0		0		0		0.000165948		0		0.000178795		0		0.000154751		0		0		0		0.000428082	0	0.000181121	0	0.110681	0.00150497	0.00297161
	Enterobacterales_A_737866 Order		0.0016545		0		0		0		0.00080079		0		0.000344012		0		0.00113379		0		0		0		0.00187037	0	0	0	0.385435	2.29057e-09	3.25596e-08
	Enterobacteriaceae_A Family		0.00812738		0.01475		0.00854426		0.00139291		0.0226396		0.00943644		0.00488956		0.00264067		0.0289977		0.0123319		0.00387612		0.00268518		0.0380711	0.0210283	0.0129423	0.0026033	0.838279	0.000144409	0.0100716
	Flavobacterium		0		0		0		0		0.000164643		0		0		0		0		0		0		0		0.000164643	0.000131851	0	0	0.0982863	0.0117751	0.000551859
	Gammaproteobacteria Class		0.00498454		0.0160192		0.00999839		0.0366567		0.0117787		0.0130292		0.0199229		0.0396576		0.00897265		0.00484312		0.00423127		0.0375583		0.00825953	0.0113897	0.0178561	0.0126631	0.0947156	5.17786e-09	2.28848e-07
	Helicobacter_E		0.00323437		0.000391028		0.000385455		0		0.00295052		0.000671993		0.00049793		0.000120938		0.00316793		0.000654901		0.000545984		0.000235583		0.00473989	0.000555623	0.000458697	0.000275686	0.92153	1.25658e-09	1.89934e-06
	Luteimonas_C_615545		0		0		0		0		0		0		0		0		0		0		0		0		0	0	0	0	0.281266	0.00149317	0.00443443
	Oscillospirales Order		0		0		0.000758424		0.000318369		0.000226513		0		0.000864825		0.00165075		0		0.00044809		0.000841302		0.000132617		0.000248921	0.00045168	0.0013933	0.000816165	0.56003	2.11233e-05	0.000264047
	Pectobacterium		0		0.111742		0.132941		0.000119199		0.00771656		0.0264317		0.00849987		0.00148744		0.0168855		0.0596853		0.0320491		0.00181143		0.0202091	0.112607	0.141163	0.00260934	0.4285	4.89003e-06	0.000227887
	Phocaeicola_A_842212		0.0034658		0.00445017		0.00470191		0.0074743		0.00821111		0.0122452		0.00285747		0.00550395		0.0108465		0.00913415		0.0115011		0.0120779		0.00864169	0.012044	0.00797521	0.00628784	0.00151941	0.789579	0.0082729
	Prevotella		0.237296		0.220199		0.31892		0.269652		0.202843		0.207564		0.301755		0.231421		0.174672		0.184555		0.359551		0.263274		0.128444	0.104692	0.0826872	0.0489948	0.892771	0.00021792	0.0313134
	Proteobacteria Phylum		0.00239751		0.00124418		0.00121188		0.0104039		0.00441701		0.0027842		0.00351979		0.0127432		0.0130803		0.000664954		0.000340774		0.00757015		0.0118865	0.00355952	0.00303009	0.00640352	0.0142158	2.82598e-06	2.76266e-05
	Pseudarthrobacter_385634		0.000315477		0		0		0.00070418		0.000396398		0		0.000284277		0		0.00030012		0.000336431		0		0		0.000583878	0.000193735	0.000283597	0	0.693744	0.00236189	1.34877e-06
	Pseudomonas_E_647464		0.000252382		0		0		0		0		0		0		0		0		0		0.000140217		0		0.000252382	0	0.000177169	0	0.098157	0.0510375	0.000672842
	Pusillimonas_A		0		0		0		0.00112501		0.000622303		0		0.000189527		0.000642334		0		0		0		0.0011927		0.000510667	0	0	0.00104662	0.0268986	2.16488e-08	2.60974e-08
	RF16		0.227893		0.152572		0.103084		0.227783		0.212979		0.175248		0.232784		0.233265		0.221253		0.176305		0.0977337		0.208105		0.0706434	0.0863155	0.139485	0.0241219	0.042415	0.00564883	0.00455047
	Rhizobiaceae_A_501059 Family		0		0		0		0.000928238		0		0.00108202		0		0.00088173		0		0		0		0		0	0.000888757	0	0.000952689	4.65585e-05	0.000500516	1.70007e-06
	Ruminococcus_D		0.105863		0.128932		0.074567		0.0926763		0.144227		0.0847342		0.0682707		0.0897704		0.103698		0.102696		0.0831275		0.111607		0.0621219	0.0673441	0.0244299	0.0186718	0.291181	0.00915486	0.123826
	Shewanella		0.0048268		0.000785406		0		0.000528331		0.00116163		8.86839e-05		0.000727021		0.000555093		0.00390684		0.0141722		0		0.000653104		0.0072546	0.011909	0.00044616	0.00106513	0.683064	0.000162449	6.65879e-05
	Staphylococcus		0		0		0		0		0.000613939		0		0		0		0.000291939		0		0		0		0.000617411	0	0	0	0.87247	2.84091e-10	9.81522e-07
	Streptococcus		0.000621994		0		0		0.000364511		0.000452768		0		0.000198042		0.000114909		0.00114155		0		0		0.000248095		0.00135568	0	0	0.000420838	0.710904	4.19811e-08	4.3692e-06
	Streptomyces_G_399870		0		0		0		0		0		0		0		0.000636294		0		0		0		0		0	0	0	0.000309655	4.52101e-05	0.676894	0.00117956
	Tatumella		0		0.001525		0		0		0		0		0		0		0		0		0		0		0	0	0	0	0.00330501	0.00306053	2.63377e-07
	Treponema_D		0.00932793		0.00866642		0.02423		0.0174422		0.0179512		0.0227731		0.0320772		0.0135598		0.0190734		0.00828462		0.0239542		0.0161122		0.0120931	0.010242	0.0188502	0.00744389	0.0721212	9.59526e-05	0.000243717
	UBA1412		0		0		0		0.000622055		0		0		0		0.00076684		0.00035417		0		0		0.000492829		0.00035417	0	0	0.000566762	0.0371272	4.1884e-12	3.27016e-10
	UBA3789		0.00654652		0.0119062		0.021494		0.0164398		0.00356759		0.0198424		0.0147019		0.0217381		0.00793651		0.0146535		0.00729129		0.0221009		0.00936202	0.0138758	0.0250931	0.00566435	0.69453	7.41977e-05	0.00377038
	UBA4722		0		0		0		0		0		0		0		0.000354085		0		0		0		0		0	0	0	0.000777341	0.0933089	2.02832e-07	1.87476e-06
	Unassigned Kingdom		0		0		0		0		0.00184408		0		0		0		0		0		0		0.00232217		0.00184408	0.000932583	0	0	0.000263951	0.564938	0.00508493
	Variovorax		0.00412736		0.000523863		0		0.000522055		0.00679117		0.000573394		0.000253222		0.00089318		0.0108296		0.000453378		0		0		0.00801942	0.000873411	0	0.00143904	0.551176	2.939e-12	9.11547e-10
	Veillonella_A		0.0227852		0.0351816		0.0457221		0.0234639		0.0195818		0.0280097		0.0258399		0.0201158		0.0184511		0.0196444		0.038109		0.0200005		0.0117733	0.0156338	0.0195112	0.00397321	0.00342757	7.9307e-05	0.000189514
